# Supplementary material
Source: Springer Nature journal article supplement (https://www.springermedizin.de/resource/supplementary/12874_2010_530_MOESM3_ESM.pdf/9432408)

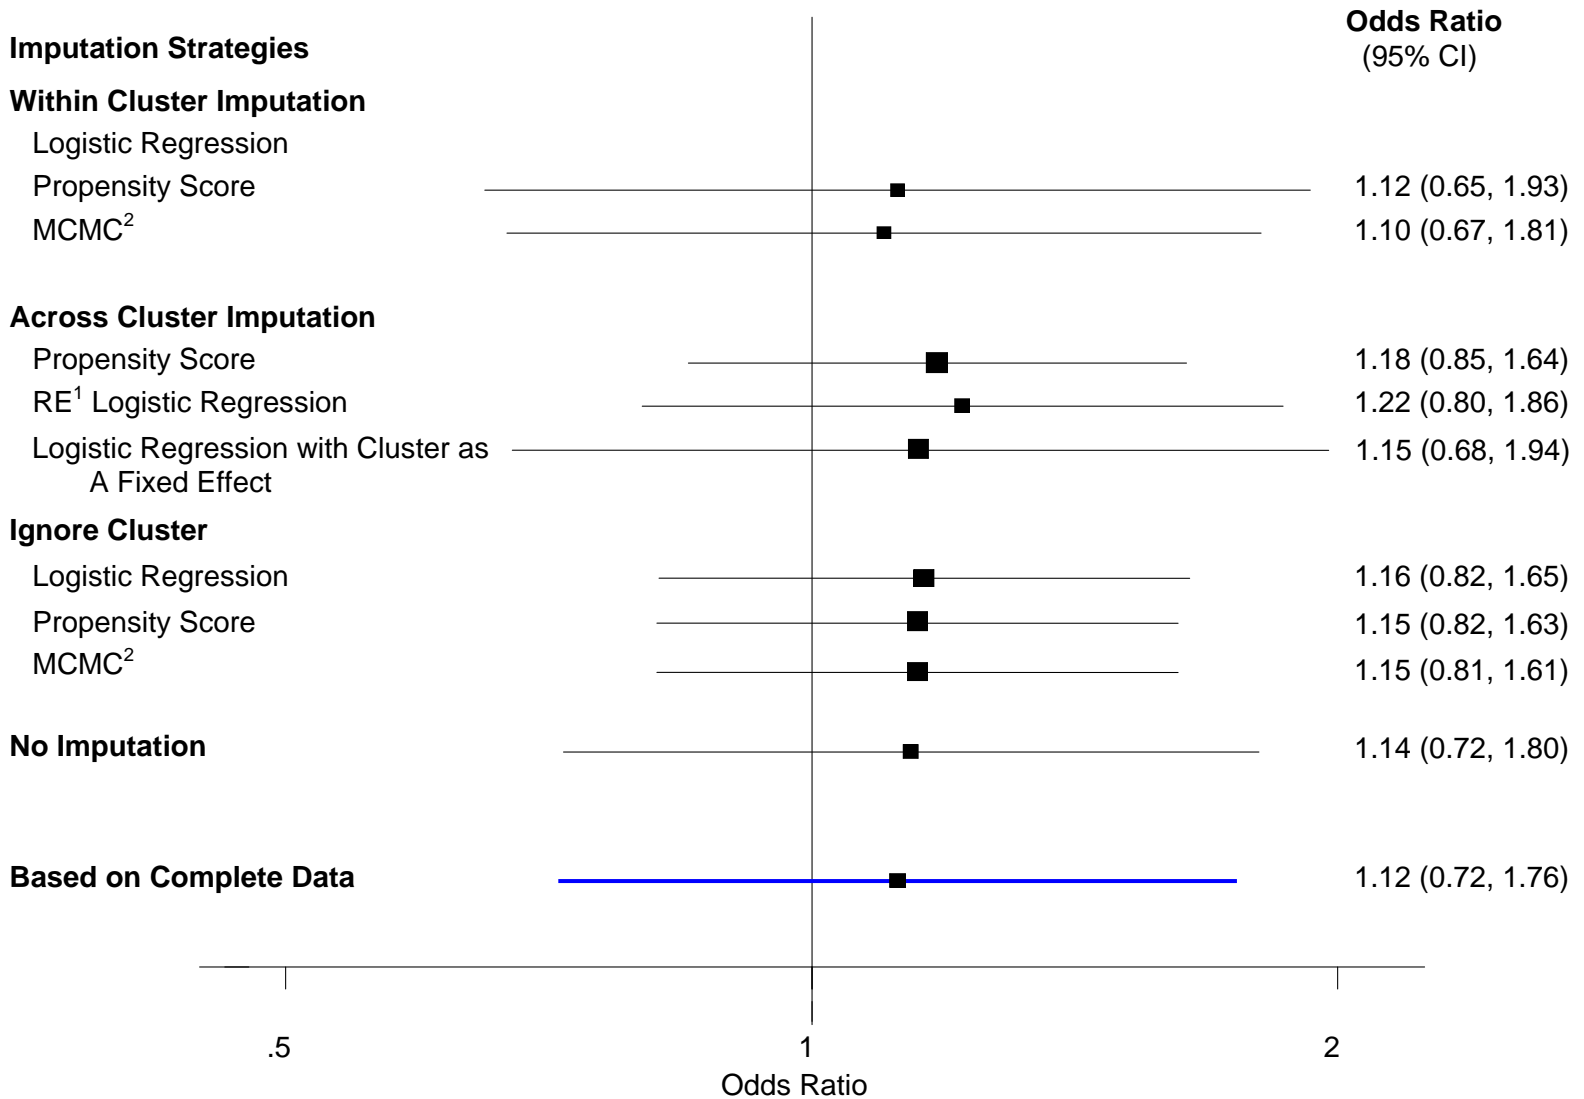

1. RE=Random-effects  
 2. MCMC=Markov chain Monte Carlo

Favors Control                      Favors CHAT Intervention

Supplement: MOESM3 [file 9432408]
